# Supplementary material for: Monocyte Distribution Width as a Pragmatic Diagnostic Screen for SARS-CoV-2 and Influenza Infection
Source: Research Square preprint supplement (doi:10.21203/rs.3.rs-1420386/v1), 2022-05-05
Supplement: Supplementary file 1 [file 71c3814d9c14feaca835ffa7.docx]

**Figure Supplement. Monocyte Distribution Width (MDW) Sensitivity Versus Specificity by Abnormal Cutoff for SARS-CoV-2 and Influenza**


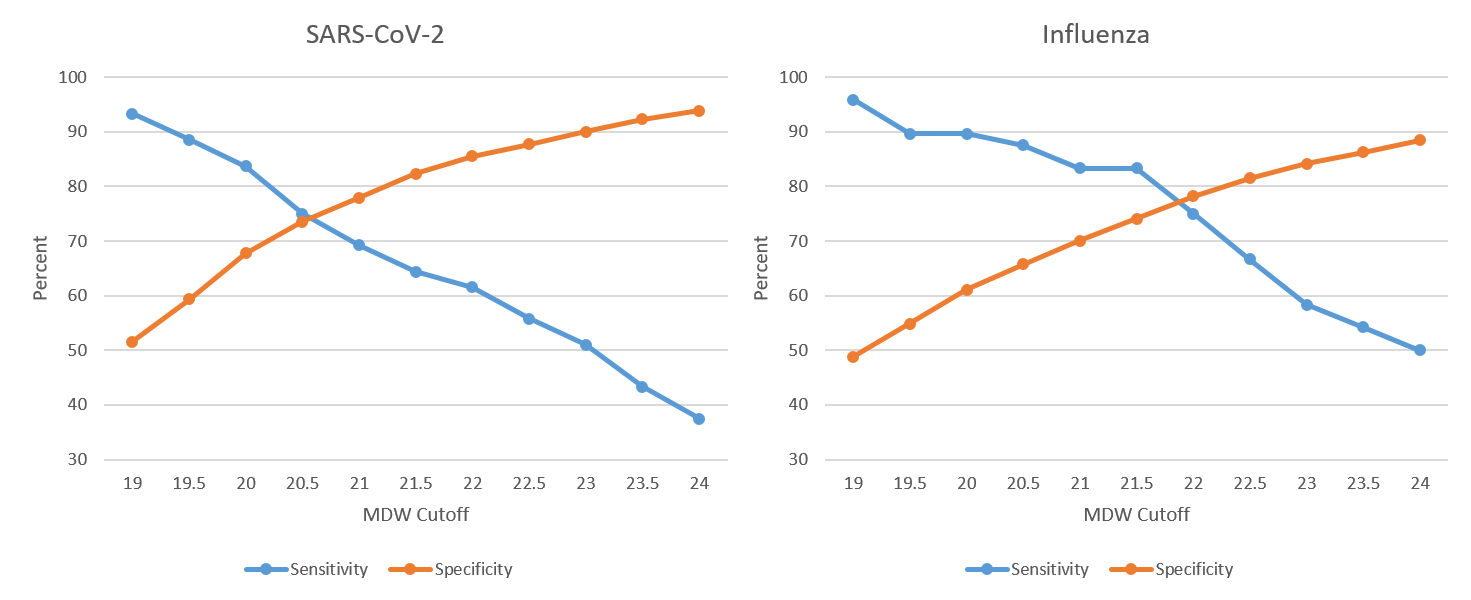


Abbreviations: SARS-CoV-2, severe acute respiratory syndrome coronavirus 2; MDW, monocyte distribution width.
